# Supplementary material for: An organic–inorganic nanohybrid of a calix[4]arene based chromogenic chemosensor for simultaneous estimation of ADP and NADH
Source: Royal Society of Chemistry journal article supplement (doi:10.1039/c5ra18003a), 2015-01-01
Supplement: c5ra18003a1.pdf [file c5ra18003a1.pdf]

## Supporting Information

### **An organic-inorganic nanohybrid of calix[4]arene based chromogenic chemosensor for simultaneous estimation of ADP and NADH**

Harpreet Kaur<sup>a†</sup>, Jasinder Singh<sup>b†</sup>, Shweta Chopra<sup>a</sup>, Pushap Raj<sup>b</sup>, Narinder Singh<sup>\*b</sup>, Navneet Kaur<sup>\*a,c</sup>

<sup>a</sup>Centre for Nanoscience and Nanotechnology (UIEAST), Panjab University, Chandigarh, India, 160014.

Tel: 91-1722534464; E-mail: [navneetkaur@pu.ac.in](mailto:navneetkaur@pu.ac.in)

<sup>b</sup>Department of Chemistry, Indian Institute of Technology Ropar (IIT Ropar), Rupnagar, Punjab, India,

140001, Tel: 91- 1881242176, E-mail: [nsingh@iitrpr.ac.in](mailto:nsingh@iitrpr.ac.in)

<sup>c</sup>Department of Chemistry, Panjab University, Chandigarh, India, 160014. Tel: 91-1722534464; E-mail:

[navneetkaur@pu.ac.in](mailto:navneetkaur@pu.ac.in)

† Both authors contributed equally.

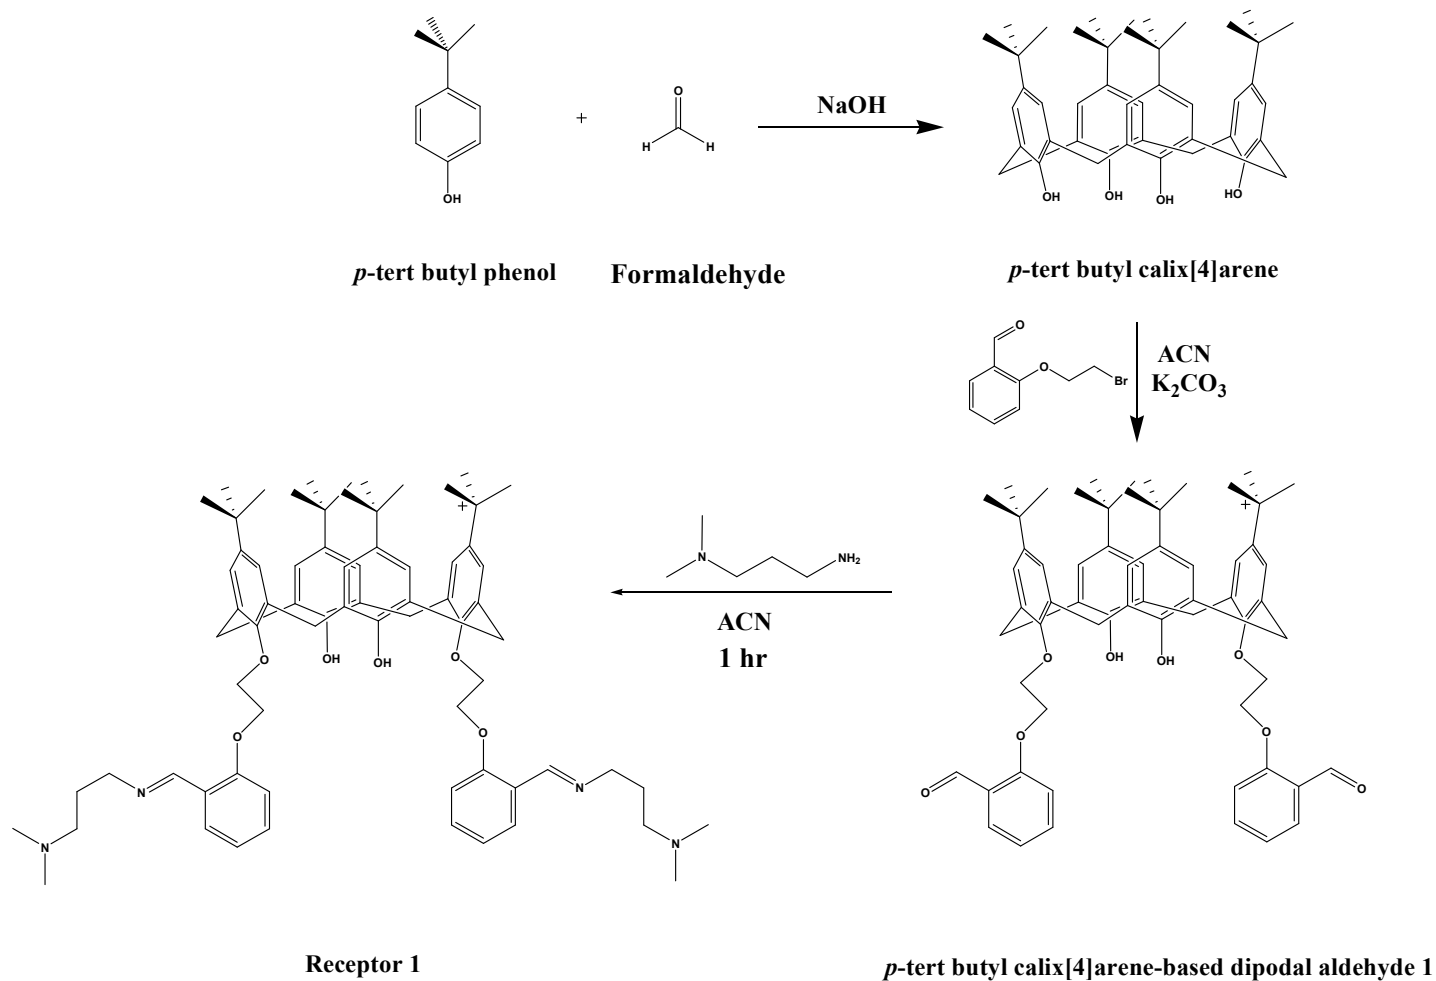

Scheme S1: Synthesis of Receptor 1

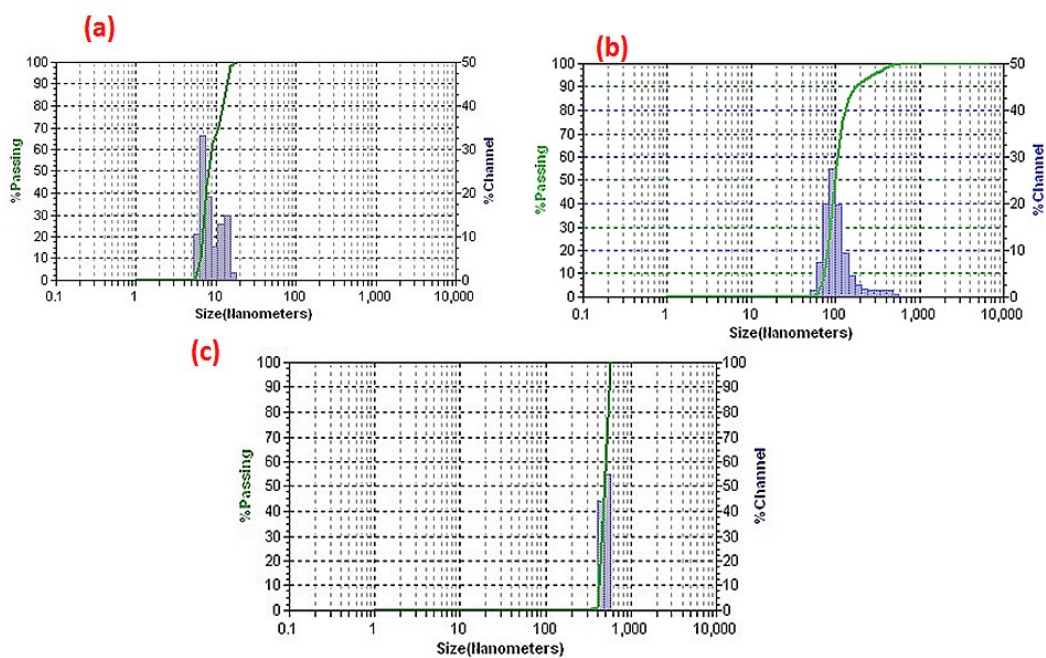

Figure S1: DLS histogram of ONPs formed at conc. (a) 0.4 nM (b) 0.8 nM (c) 1.0 nM

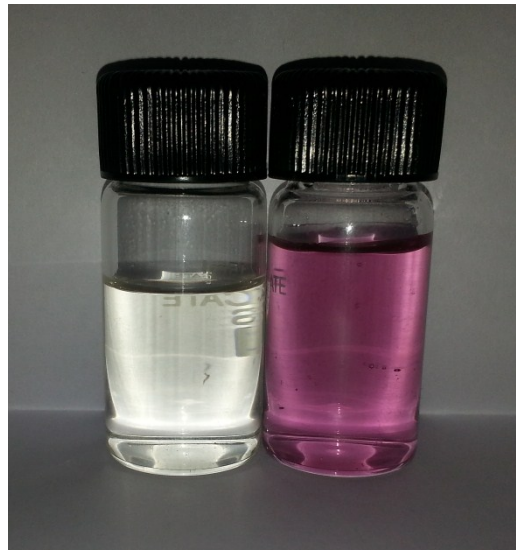

Figure S2: Colour change of **N1** on formation of **H1** from colourless to pink

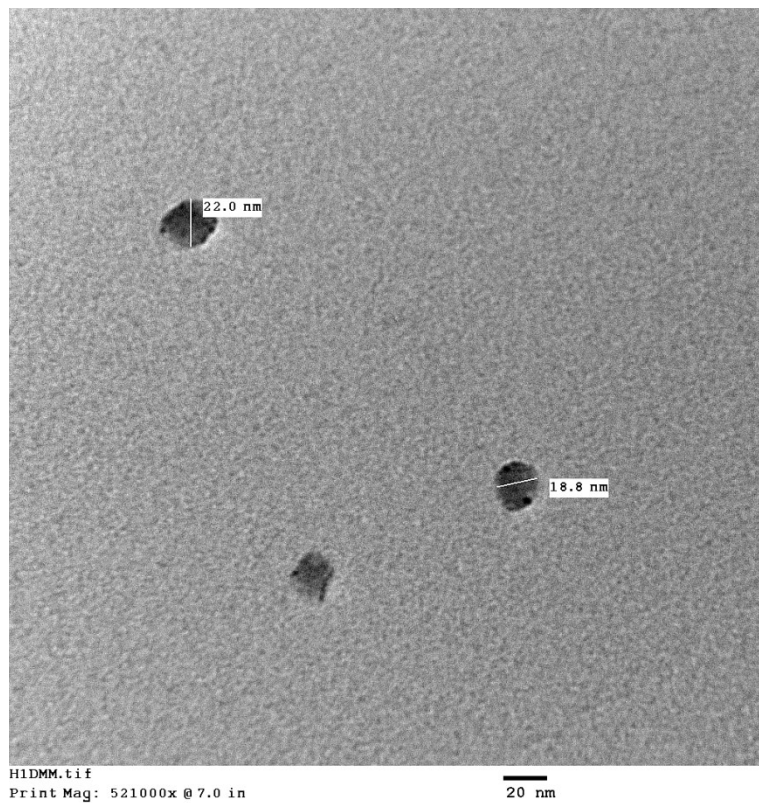

Figure S3 a: TEM image for **H1** showing a clear incorporation of dark spotted gold nanoparticles on the surface of **N1**

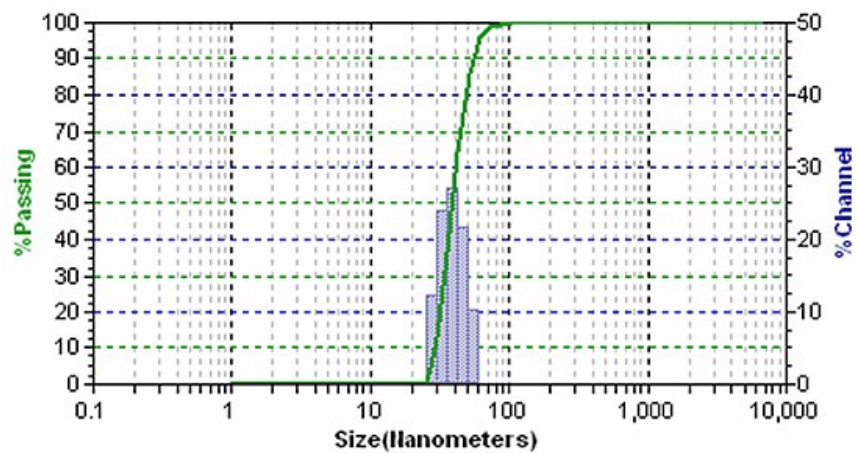

Figure S3b: DLS histogram of organic-inorganic nanohybrids of **R1** has average distribution of 28 nm.

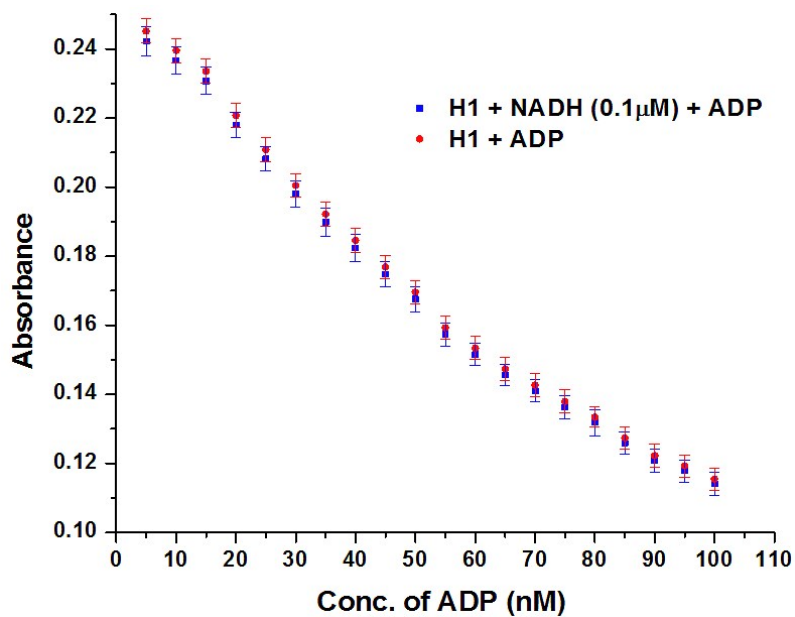

Figure S4: Comparison of calibration curves obtained by successive addition of ADP alone (blue) and ADP in presence of NADH as interferent (red).

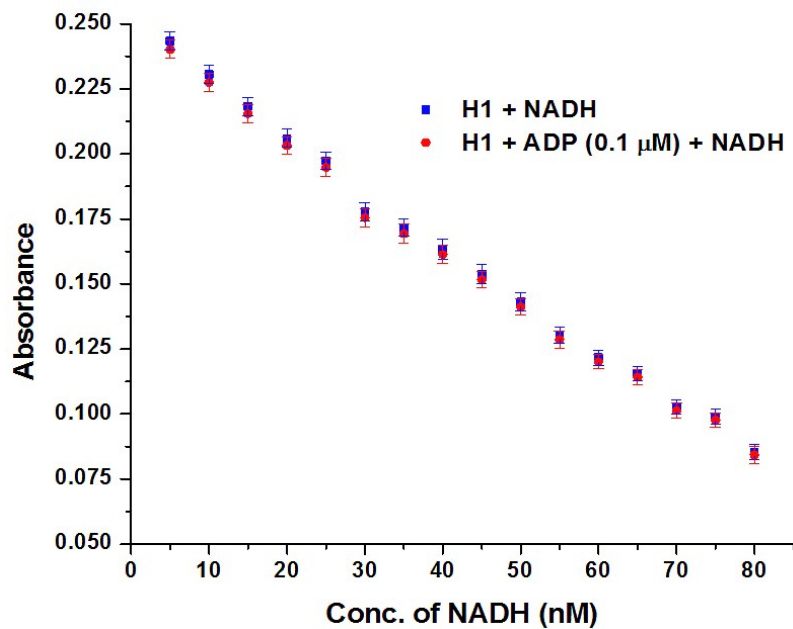

Figure S5: Comparison of calibration curves obtained by successive addition of NADH alone (blue) and NADH in presence of ADP as interferent (red).

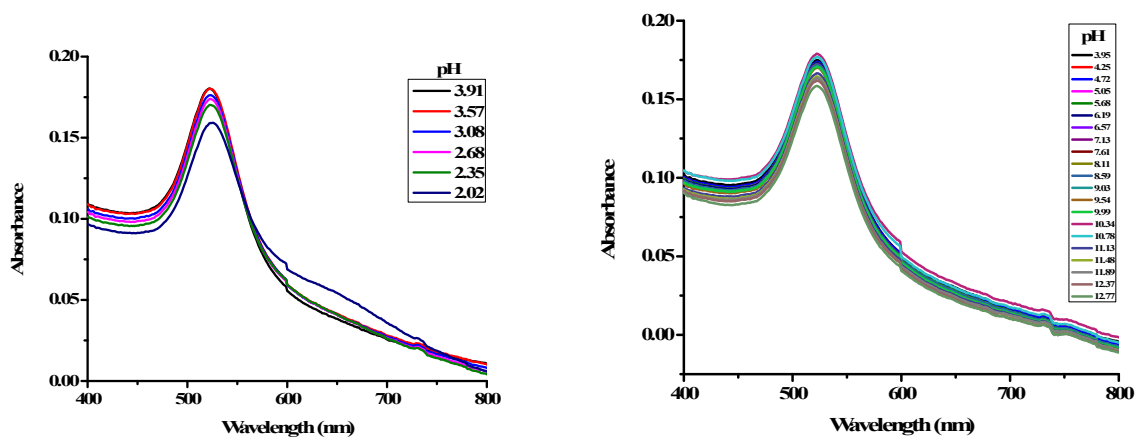

Figure S6: UV-Visible spectra of **H1** at various pH.

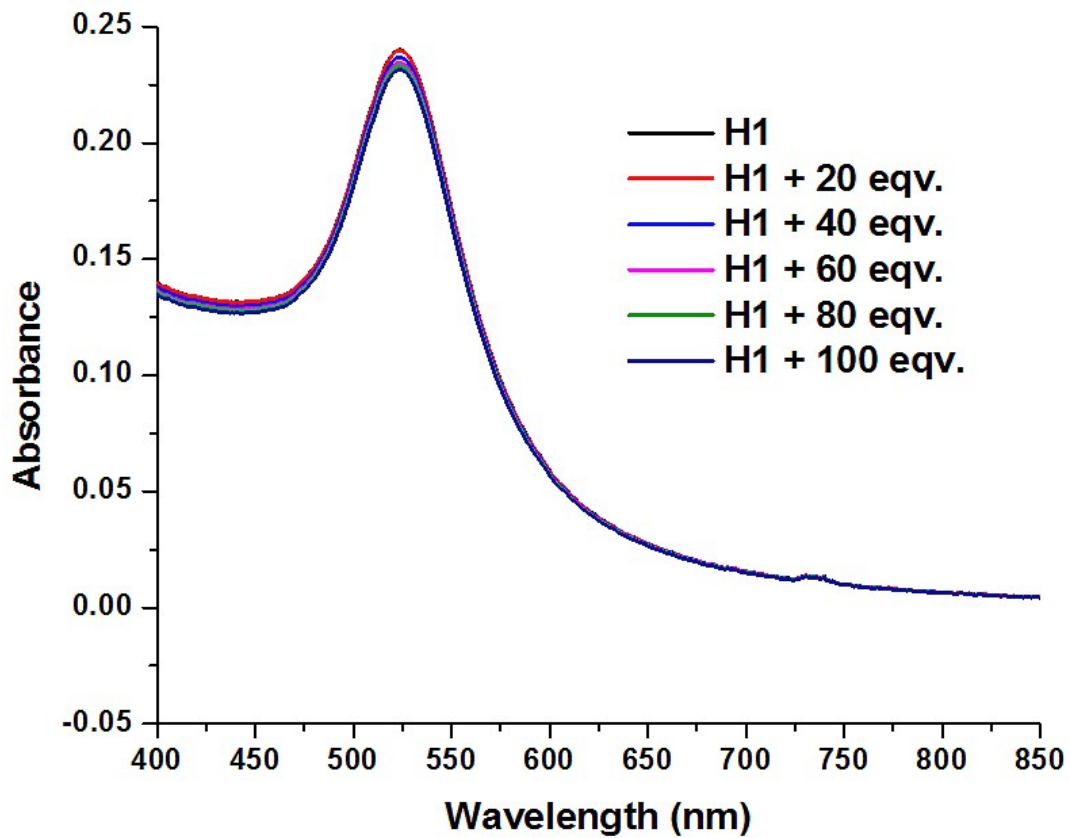

**Figure S7:** Effect of ionic concentration on absorption profile of **H1** by adding varying concentration of tetrabutyl ammonium perchlorate salt (0-100 eqv.)

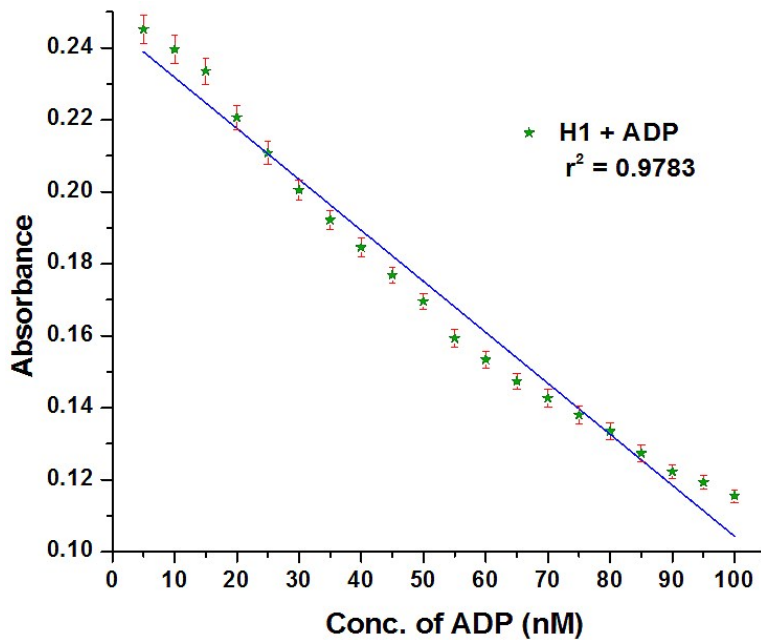

Figure 8a (Inset): Linear regression plot for ADP by adding small aliquots of ADP (0-100 nM) to solution of H1 (6 $\mu$ M)

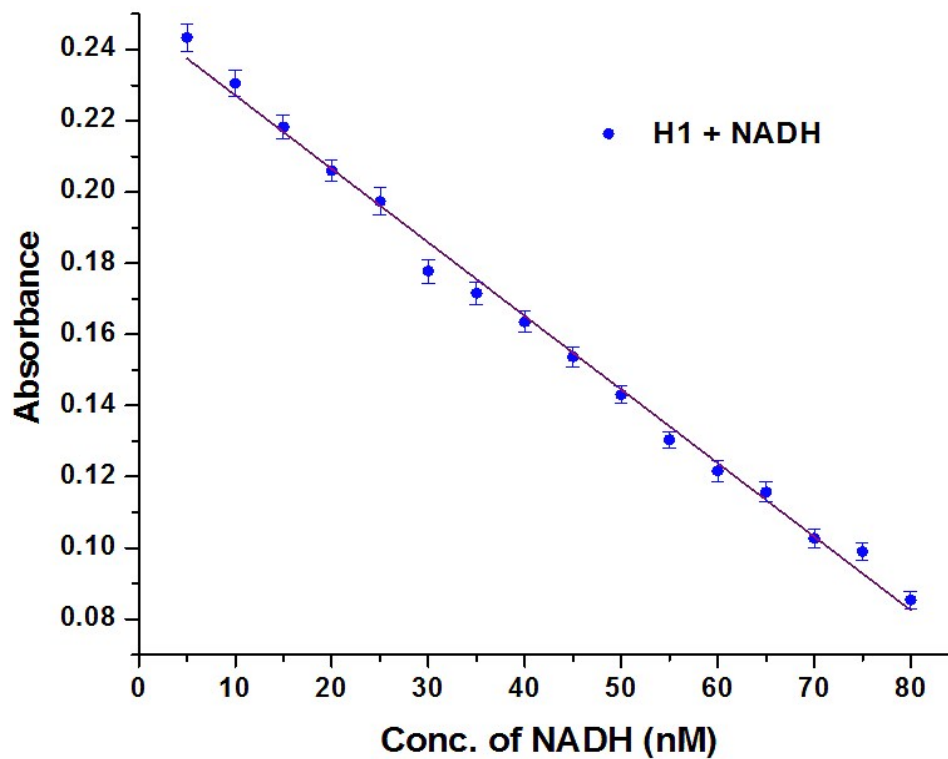

Figure 8b (Inset): Linear regression plot for NADH by adding small aliquots of NADH (0-80 nM) to solution of H1 (6 $\mu$ M)
